# Supplementary material
Source: Springer Nature journal article supplement (https://www.springermedizin.de/resource/supplementary/12885_2014_4669_MOESM2_ESM.pdf/9467008)

**a**

VAS

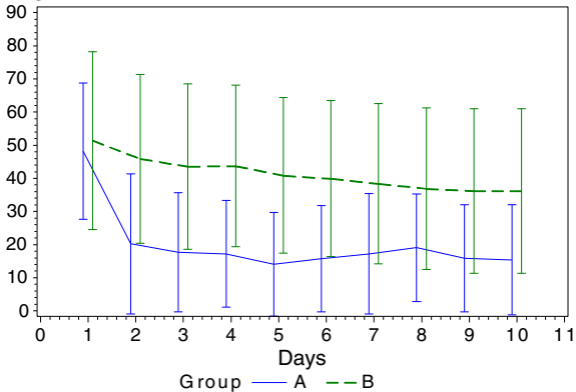**b**

VAS

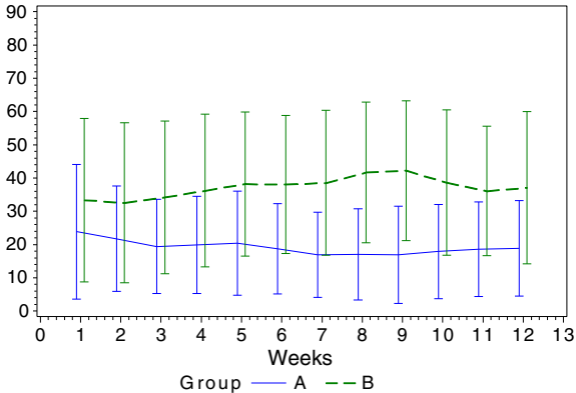

Supplement: MOESM2 [file 9467008]
